# Supplementary material for: Correlation of KRAS G12C Mutation and High PD-L1 Expression with Clinical Outcome in NSCLC Patients Treated with Anti-PD1 Immunotherapy
Source: MDPI journal article supplement (doi:10.3390/jcm11061627), 2022-03-15
Supplement: s1 [file s1]

**Table S1.** Description of KRAS mutational status. Abbreviations: *N*, number of cases; wt, wild type.

|              | <b>Entire sample</b> | <b>G12C</b> | <b>G12A</b> | <b>G12D</b> | <b>G12R</b> | <b>G12S</b> | <b>G12V</b> | <b>G13D</b> | <b>wt</b> |
|--------------|----------------------|-------------|-------------|-------------|-------------|-------------|-------------|-------------|-----------|
| <i>N</i> (%) | 44 (100%)            | 11 (25%)    | 1 (2%)      | 5 (11%)     | 1 (2%)      | 1 (2%)      | 5 (11%)     | 1 (2%)      | 19        |

**Table S2.** Description of AIC Optimised Cox Proportional Hazard Models for G12C+/. Abbreviations: CI, confidence interval; G12C+, patients with G12C mutation in *KRAS* gene; *p*, *p* value.

| <b>Risk Factor</b>    | <b>Model 1</b>      |               |                 | <b>Model 2</b>      |               |                 |
|-----------------------|---------------------|---------------|-----------------|---------------------|---------------|-----------------|
|                       | <b>Hazard Ratio</b> | <b>95% CI</b> | <b><i>p</i></b> | <b>Hazard Ratio</b> | <b>95% CI</b> | <b><i>p</i></b> |
| G12C+                 | 0.39                | 0.16-0.96     | 0.04            | 0.24                | 0.09-0.66     | 0.01            |
| Likelihood ratio test | $\chi^2(1)=5.07$    |               | 0.02            | $\chi^2(1)=10.18$   |               | <0.01           |
| Wald Test             | $\chi^2(1)=4.24$    |               | 0.04            | $\chi^2(1)=7.82$    |               | 0.01            |
| Log Rank Test         | $\chi^2(1)=4.53$    |               | 0.03            | $\chi^2(1)=8.88$    |               | <0.01           |
| Concordance           | 0.58                |               |                 | 0.62                |               |                 |

**Table S3.** Description of AIC Optimised Cox Proportional Hazard Models for *KRAS*+/. Abbreviations: CI, confidence interval; *KRAS*+, patients with any mutation in *KRAS* gene; *p*, *p* value.

| <b>Risk Factor</b>           | <b>Model 1</b>      |               |                 | <b>Model 2</b>      |               |                 |
|------------------------------|---------------------|---------------|-----------------|---------------------|---------------|-----------------|
|                              | <b>Hazard Ratio</b> | <b>95% CI</b> | <b><i>p</i></b> | <b>Hazard Ratio</b> | <b>95% CI</b> | <b><i>p</i></b> |
| <i>KRAS</i> +                | 0.63                | 0.32-1.24     | 0.18            | 0.47                | 0.23-0.97     | 0.04            |
| Presence of brain metastases |                     |               |                 | 1.55                | 0.90-2.69     | 0.11            |
| Likelihood ratio test        | $\chi^2(1)=1.75$    |               | 0.2             | $\chi^2(2)=5.4$     |               | 0.07            |
| Wald Test                    | $\chi^2(1)=1.79$    |               | 0.2             | $\chi^2(2)=5.2$     |               | 0.06            |
| Log Rank Test                | $\chi^2(1)=1.82$    |               | 0.2             | $\chi^2(2)=5.72$    |               | 0.06            |
| Concordance                  | 0.57                |               |                 | 0.62                |               |                 |
